# Supplementary material
Source: PubMed Central journal article supplement (PMC524450)
Supplement: pnas_101_43_15301__1.pdf [file pnas_101_43_15301__1.pdf]

## Supporting Text

**DNA template construction.** By linearizing with different restriction enzymes, the DNA template of the U3 small nucleolar RNA (snoRNA) could be used to transcribe the full length U3 snoRNA and 5'-fragments thereof. The DNA template for *in vitro* transcription of the 3' domain of the U3 snoRNA containing nucleotides 77-333 (pUCU3-3') of the full length RNA was amplified from the template pGEMsnR17a provided by S. J. Baserga (Yale University, New Haven, CT) with *SalI* (5') and *BamHI* (3') restriction sites (New England Biolabs) using two primers (5'-GCGCGGTCGACTAATACGACTCACTATAGGCCAACTTGGTTGATGAGTCCCA TAACC-3' and 5'-GCGCGGATCCGGTCTCTACTTGT CAGACTGCCATTTG-3'). The DNA template for the pre-rRNA fragment (nucleotides 469-722, pUCpre) was amplified from *Saccharomyces cerevisiae* genomic DNA (American Type Culture Collection) with *EcoRI* (5') and *BamHI* (3') sites (New England Biolabs) using two primers (5'-GCGGAATTCTAATACGACTCACTATAGGCTCAAATCAGCGATATCAAACGTA CC-3' and 5'-CGGGATCCCCCGCCCCCTACTGGCAGGATCAACCAGATAACTATC-3') and cloned into a pUC19 vector.

The Imp4-core representing amino acids 87-275 of Imp4p (pETImp4core) was amplified from ORF coding for full length Imp4p using two primers (5'-GCGGAATTCATGGATCCAAGAATCATCGTCACAAC-3' and 5'-GCGCAAGCTTTCACTCAACATCAGCGTCCTTATTTTC-3') and cloned into a pProExHTa vector.

**RNA synthesis.** The following designations were used for the U3 snoRNA: 5' domain plus the hinge region (nucleotides 1-76); the 3' domain (nucleotides 71-333) is the 3' remainder of the U3 snoRNA; and the pre-rRNA fragment (nucleotides 469-722) (Fig. 1). The full length U3 snoRNA (nucleotides 1-333), the 5' domain plus hinge region (nucleotides 1-76), the 5' domain (nucleotides 1-36), the 3' domain (nucleotides 71-333) and the pre-rRNA fragment (nucleotides 469-722) were produced by run-off transcription

using plasmid DNA templates linearized with the following restriction enzymes: *Bsa*I (U3 full length and 3' domain), *Bsm*FI (5' domain plus hinge region), *Fau*I (nucleotides 469-722 of the pre-rRNA) (New England Biolabs), and *Nmu*CI (5' domain) (Fermentas, Hanover, MD). The minimal RNA-binding site (nucleotides 4-50), herein designated U3 MINI, for Imp3p and Imp4p binding was transcribed from a synthetic oligonucleotide template (Integrated DNA Technologies, Coralville, IA). The RNA oligomers representing the ETS and 18S base pairing sites were synthesized by solid-phase oligonucleotide synthesis (Dharmacon, Lafayette, CO). Internally radiolabeled RNAs were made by *in vitro* transcription using published procedures (1). After shrimp alkaline phosphatase treatment, T4 kinase (Fermentas) was used in the presence of [ $\gamma$ - $^{32}$ P]ATP (Perkin--Elmer, 150  $\mu$ Ci/ $\mu$ l) to label at the 5'-end of each RNA according to the manufacturer's instructions. Each RNA was purified by denaturing PAGE. The following RNA sequences were used in this paper: the ETS site (5'-AGUUUCUCAC-3'); the antisense ETS site (5'-UGUUUCUCAC-3'); the 18S site (5'-GGUUGAUCCUGCCAGUA-3'); the antisense 18S site (5'-CUUACUAGGACCCUCAU-3'); 5' hinge region (5'-GGCACUCUUUGACU-3'); U3 MINI (5'-GGACGUACUUCAUAGGAUCAUUUCUAUAGGAAUCGUCACUCUUUGACU-3'); U3 MINIAS1 (5'-GGACGUACUUCAUAGGAUCAUUUCUAUAGGAAUCGUCAGAGAAACUGA-3'); U3 MINIAS2 (5'-GGACGAUGAUCAGUCCUAGUUAGGACUAUCAUUCGUCACUCUUUGACU-3'); U3 MINIAS3 (5'-GGACGAUGAUCAGUCCUAGUUAGCUAUAGGAAUCGUCACUCUUUGACU-3'); the U3 hinge (5'-GGCACUCUUUGACUCUUCAAAAGAGCCACUGAAUCCAA-3'); the 5' domain (5'-GGUCGACGUACUUCAUAGGAUCAUUUCUAUAGGAAUCGUCACUC -3'), the 256 nucleotide fragment of the pre-rRNA that contains the ETS site, the 18S site and the intervening sequence (5'-GGUCUAAAUCAGCGAUUCAAAACGUACCAUUCGUGAAACACCGGGGUAU CUGUUUGGUGGAACCUGAUUAGAGGAAACUCAAAAGAGUGCUAUGGUAUGG

UGACGGAGUGCGCUGGUCAAGAGUGUAAAAGCUUUUUGAACAGAGAGCAU  
UUCCGGCAGCAGAGAGACCUGAAAAAGCAAUUUUUCUGGAAUUUCAGCUG  
UUUCCAAACUCAAUAAAGUAUCUUCUAGCAAGAGGGAAUAGGUGGGAAAAA  
AAAAAAGAGAUUUCGGUUUCUUUCUUUUUUACUGCUUGUUGCUUCUUCUU  
UUAAGAUAGUUAUCUGGUUGAUCCUGCCAGUA-3'); the U3 snoRNA 5' domain  
plus hinge region (5'-

GGUCGACGUACUUCAUAGGAUCAUUUCUAUAGGAAUCGUCACUCUUUGAC  
UCUUCAAAAGAGCCACUGAAUCCAACU-3'); the U3 snoRNA (5'-

GGUCGACGUACUUCAUAGGAUCAUUUCUAUAGGAAUCGUCACUCUUUGAC  
UCUUCAAAAGAGCCACUGAAUCCAACUUGGUUGAUGAGUCCCAUAACCUU  
UGUACCCAGAGUGAGAAACCGAAAUUGAAUCUAAAUUAGCUUGGUCCGC  
AAUCCUUAGCGGUUCGGCAUCUAUAAUUUUGAAUAAAAUUUUGCUUUG  
CCGUUGCAUUUGUAGUUUUUCCUUUGGAAGUAAUUACAAUAAUUUAUGG  
CGCGAUGAUCUUGACCCAUCCUAUGUACUUCUUUUUUGAAGGGAUAGGGC  
UCAUUGGGUG GGUACAAAUG GCAGUCUGACAAGUA-3'); the 3' domain of the  
U3 snoRNA (5'-

GGCCAACUUGGUUGAUGAGUCCCAUAACCUUUGUACCCAGAGUGAGAAA  
CCGAAAUUGAAUCUAAAUUAGCUUGGUCCGCAAUCCUUAGCGGUUCGGCC  
AUCUAUAAUUUUGAAUAAAAUUUUGCUUUGCCGUUGCAUUUGUAGUUUU  
UUCCUUUGGAAGUAAUUACAAUAAUUUAUGGCGCGAUGAUCUUGACCCAU  
CCUAUGUACUUCUUUUUUGAAGGGAUAGGGCUCUAUGGGUGGGUACAAAU  
GGCAGUCUGACAAGUA-3'). The underlined nucleotides were added or mutated to G  
to aid high-level *in vitro* transcription.

**Nitrocellulose filter binding and electromobility shift assays.** RNA fragments were annealed in water before use: U3 MINI (nucleotides 4-50), the ETS site, the 18S site, and the 5' domain (nucleotides 1-36) were incubated at 100°C (2 min), then on ice (10 min); other RNA constructs were incubated at 100°C (3 min), cooled at room temperature (3 min), then incubated with 10 mM MgCl<sub>2</sub> at 55°C (3 min). Before the binding assays, ribonucleoprotein (RNP) complexes were assembled under the following

conditions: increasing amounts of protein (100 nM to 5  $\mu$ M) were incubated with up to 10 nM radiolabeled RNA for 5 min in binding buffer [20 mM Tris (pH 8.0)/30 mM  $\text{NH}_4\text{Cl}$ /100 mM KCl/0.5 mM  $\text{MgCl}_2$ /1 mM DTT/4% (vol/vol) glycerol/0.1% (wt/vol) Nonidet P-40/0.2 units/ $\mu$ l RNasin (Promega)] in 12- $\mu$ l final volume. Nitrocellulose filter-binding assays were done by using published procedures (1). For electromobility shift assays, the RNP complexes (8  $\mu$ l) were resolved on a 6% nondenaturing PAGE [40 mM Tris•acetate (pH 8.0)/1 mM EDTA/50 mM KCl/2.5% (vol/vol) glycerol] run for 50 min at 125 V at 4°C. The results of the assays were visualized by autoradiography by using a Fuji imaging plate (Bas-III) and a Molecular Dynamics Storm 860 PhosphorImager (Amersham Pharmacia). Radioactivity was quantified with the IMAGEQUANT 5.0 (Amersham Biosciences) software package. Dissociation constants were fit by ORIGIN 6.0 (Microcal, Amherst, MA) to Eq. 1:

$$f = \frac{[protein]}{[protein] + K_d}, \quad [1]$$

where  $f$  is the fraction bound; typically, saturating values of  $f$  range from 0.7 to 1.0.

**RNase protection assays.** RNP complexes containing protein and 1,000 cpm 5'-radiolabeled RNA were assembled in binding buffer. RNA fragments were refolded before the assays (see above). Nuclease protection patterns were generated by mixing 5  $\mu$ l of RNP complexes (assembled as above) with 1  $\mu$ l of either RNase T1 or snake venom ribonuclease (RNase V<sub>1</sub>) (Ambion, Austin, TX). After 5-min incubation at room temperature, the reactions were stopped with 24  $\mu$ l of urea dye [9 M urea/50 mM EDTA/0.02% xylene cyanole/0.02% bromophenol blue/0.65 $\times$  90 mM Tris-borate (pH 8.0)/2.0 mM EDTA]. Sequencing markers were generated by partial RNase T1 digestion [0.005 units of RNase T1 in 50 mM Tris (pH 7.5)/ 0.05% (vol/vol) Triton X-100] or partial alkaline hydrolysis [1 mM glycine (pH 9.5)/0.5 mM  $\text{MgCl}_2$ ] of the RNA template. Samples were resolved on 10% denaturing PAGE run for 1.5 h at 20 W. Control reactions in the annealing assays used 1  $\mu$ M of either the RNA-binding domain of the human U1A protein (2) or *Bacillus subtilis* RNase P protein (3). The U1A and RNase P proteins were gifts from B. L. Golden (Purdue University, West Lafayette, IN).

1. Dresios, J., Chan, Y. L. & Wool, I. G. (2002) *J. Mol. Biol.* **316**, 475-88.

2. Oubridge, C., Ito, N., Evans, P. R., Teo, C. H. & Nagai, K. (1994) *Nature* **372**, 432-438.

3. Niranjanakumari, S., Kurz, J. C. & Fierke, C. A. (1998) *Nucleic Acids Res.* **26**, 3090-3096.
