# Supplementary material
Source: PubMed Central journal article supplement (PMC524450)

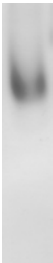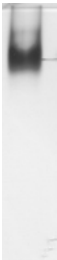

Supplement: pnas_101_43_15301__2.pdf [file pnas_101_43_15301__2.pdf]

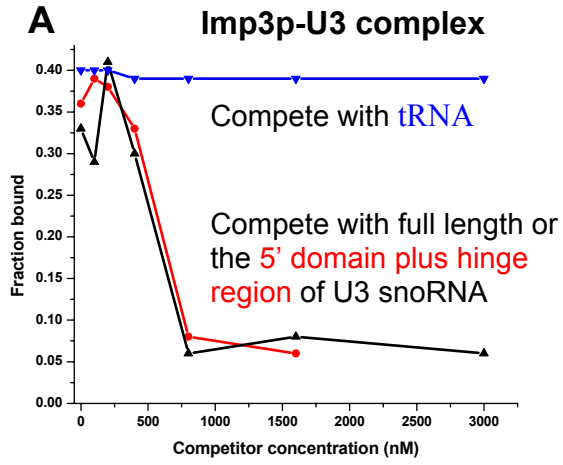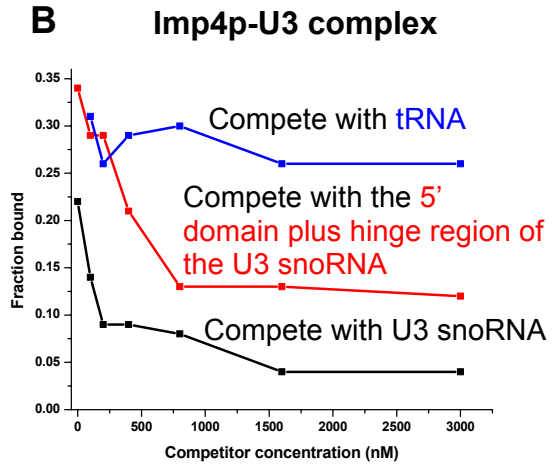

Supplement: pnas_101_43_15301__3.pdf [file pnas_101_43_15301__3.pdf]

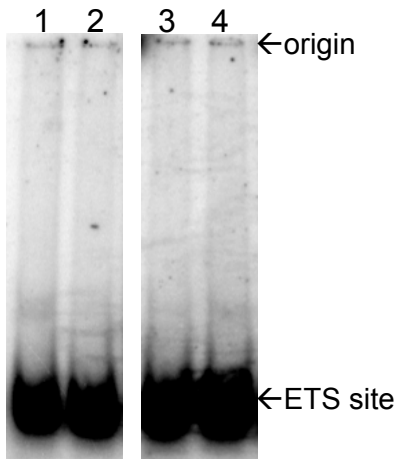

Supplement: pnas_101_43_15301__4.pdf [file pnas_101_43_15301__4.pdf]
